# Supplementary material
Source: MDPI journal article supplement (https://www.mdpi.com/2077-0472/9/5/112)

**Supplementary Figure 2.** Frequency (histogram) of ten quantitative traits of proso millet germplasm conserved at the ICRISAT genebank, Patancheru, India.

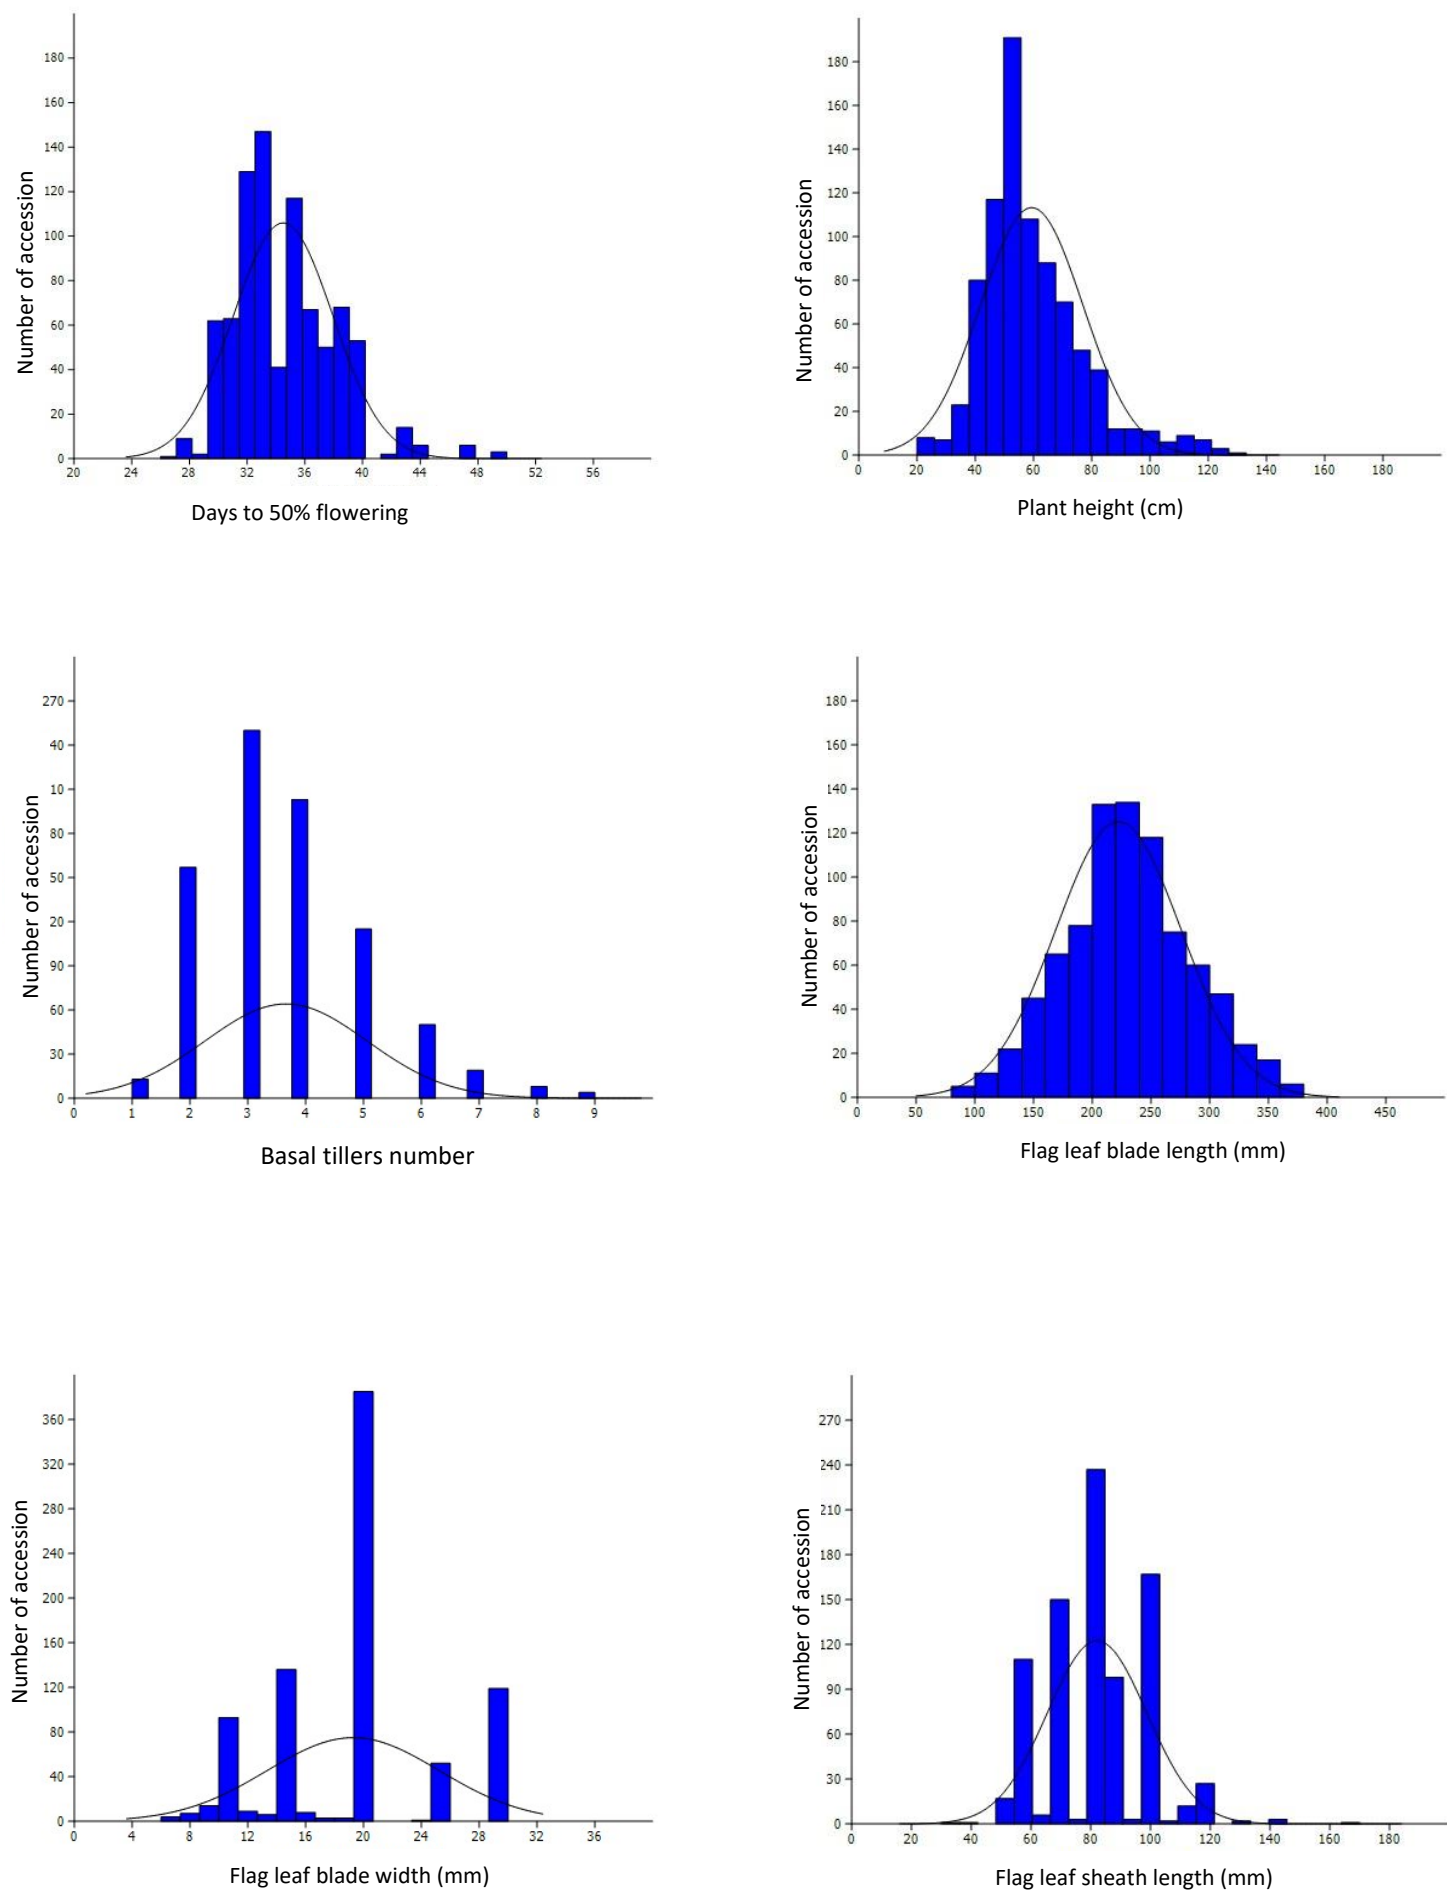

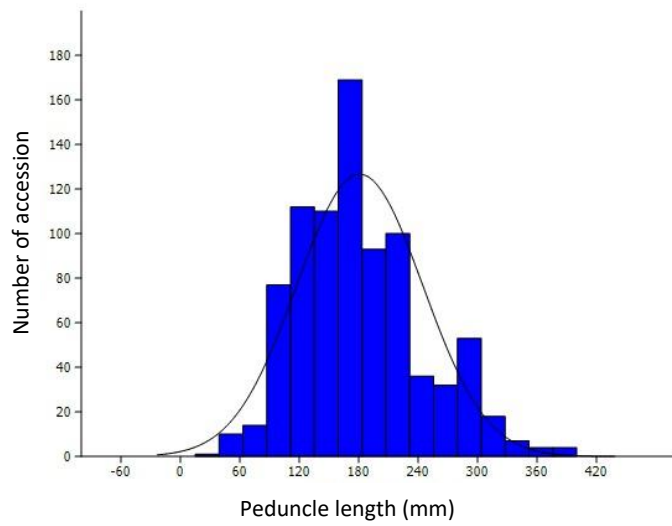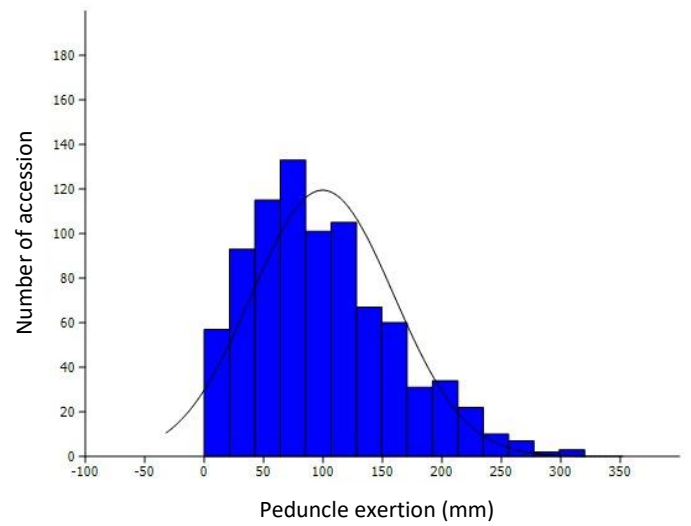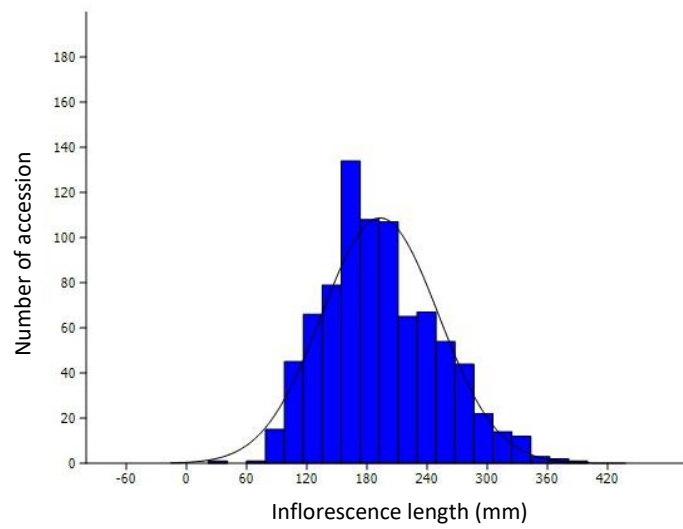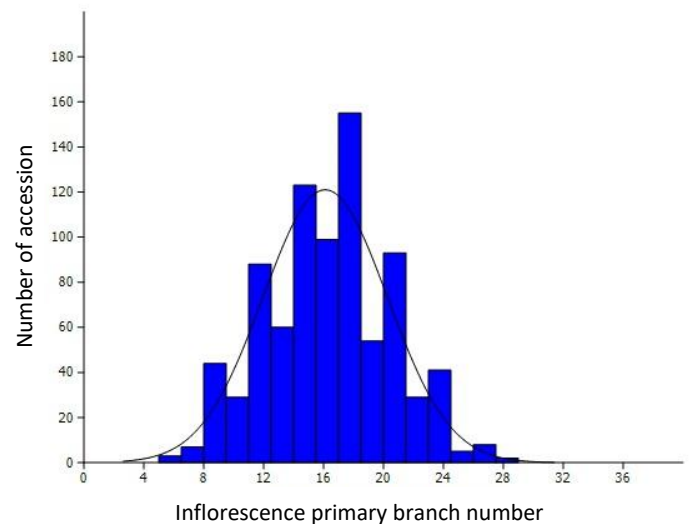

Supplement: s1 [file s1]
